# Supplementary material for: Palmitic Acid Downregulates Thyroglobulin (Tg), Sodium Iodide Symporter (NIS), and Thyroperoxidase (TPO) in Human Primary Thyrocytes: A Potential Mechanism by Which Lipotoxicity Affects Thyroid?
Source: Hindawi journal article supplement (doi:10.1155/2018/4215848), 2018-10-17
Supplement: f1 [file 4215848.f1.pdf]

# Supplementary Figure 1

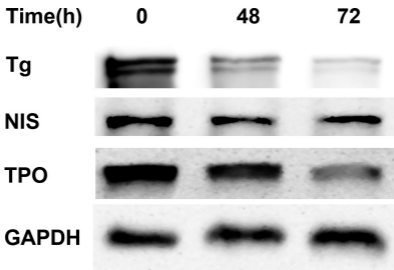

# Supplementary Figure 2

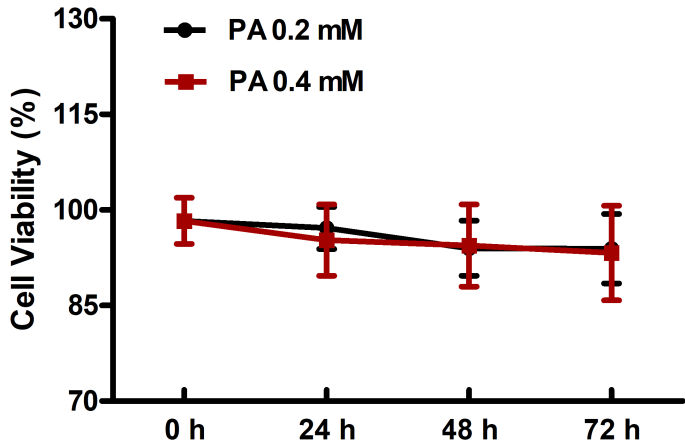

# Supplementary Figure 3

**A**

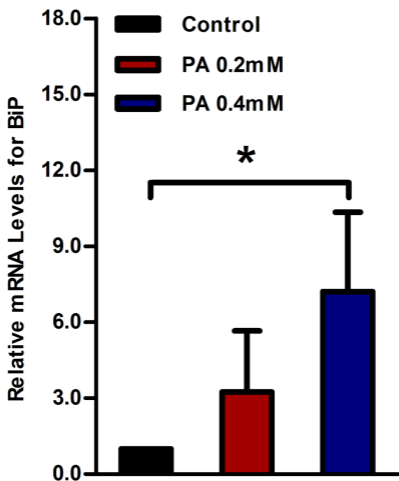

**B**

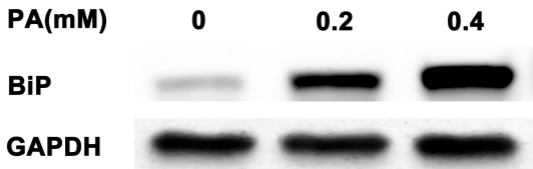

## Supplementary Figure Legends

**Supplementary Fig. 1.** Palmitic acid time-dependently down-regulates the protein levels of thyroglobulin (Tg), sodium iodide symporter (NIS) and thyroperoxidase (TPO). The data are observed in the cells with the palmitic acid stimulation at the concentration of 0.2 mM for 72 hours. PA, palmitic acid.

**Supplementary Fig. 2.** Cell viability was not influenced by palmitic acid stimulation in human primary thyrocytes. The data are observed in the cells with the palmitic acid stimulation at the concentration of 0.2 mM and 0.4mM for 24hours, 48hours and 72 hours, respectively (n=5). All data are expressed as the mean  $\pm$  standard deviation. PA, palmitic acid.

**Supplementary Fig. 3.** Palmitic acid up-regulates the expression of binding immunoglobulin protein (BiP) in human primary thyrocytes. (A) The mRNA levels of BiP in cells stimulated with palmitic acid for 24 hours (n = 3). The data are expressed as the mean  $\pm$  standard deviation. \*P < 0.05 versus human primary thyrocytes without palmitic acid stimulation. The error bars represent the standard deviations. (B) Dose-dependent effects of palmitic acid on the protein levels of BiP for 72 hours detected by western blot. PA, palmitic acid; BiP, binding immunoglobulin protein.

Figure 1 B

| <b>Dose-dependent Effect</b> |                   |                   |           |
|------------------------------|-------------------|-------------------|-----------|
| TG                           | PA Treatment (mM) |                   |           |
|                              | 0                 | 0.2               | 0.4       |
|                              | 0.1235955         | 0.1794872         | 0.2816902 |
|                              | 0.06854532        | 0.1380177         | 0.1524778 |
|                              | 0.06319115        | 0.1030338         | 0.159464  |
|                              | 0.1113714         | 0.1490733         | 0.2571467 |
|                              | 0.06852839        | 0.1379758         | 0.2549621 |
|                              | 0.08700101        | 0.1187774         | 0.2245361 |
|                              | FFA               | PA Treatment (mM) |           |
| 0                            |                   | 0.2               | 0.4       |
| 0.20496                      |                   | 0.398914          | 0.673184  |
| 0.322745                     |                   | 0.316328          | 0.550077  |
| 0.118373                     |                   | 0.2988            | 0.445025  |

| <b>Time-dependent Effect</b> |                  |          |          |
|------------------------------|------------------|----------|----------|
| TG                           | PA Treatment (h) |          |          |
|                              | 0                | 12       | 48       |
|                              | 0.127621         | 0.36541  | 0.424142 |
|                              | 0.202201         | 0.301469 | 0.562999 |
|                              | 0.133451         | 0.309    | 0.54296  |
| FFA                          | PA Treatment (h) |          |          |
|                              | 0                | 12       | 48       |
|                              | 0.20496          | 0.398914 | 0.761676 |
|                              | 0.322745         | 0.316328 | 0.908996 |
|                              | 0.118373         | 0.2988   | 0.671789 |

Figure 2 A

|        | PA Treatment (mM) |          |          |
|--------|-------------------|----------|----------|
|        | 0                 | 0.2      | 0.4      |
| Tg     | 1                 | 0.659754 | 0.447513 |
|        | 1                 | 0.895025 | 0.779165 |
|        | 1                 | 0.712025 | 0.543367 |
| SLC5A5 | 1                 | 0.441352 | 0.146604 |
|        | 1                 | 0.381565 | 0.105843 |
|        | 1                 | 0.632878 | 0.156041 |
|        | 1                 | 0.438303 | 0.136201 |
| TPO    | 1                 | 0.846745 | 0.320857 |
|        | 1                 | 0.574349 | 0.183011 |
|        | 1                 | 0.846745 | 0.702223 |
|        | 1                 | 0.907519 | 0.702223 |
|        | 1                 | 0.870551 | 0.716978 |

Figure 2 D

|     | PA Treatment (mM) |           |           |
|-----|-------------------|-----------|-----------|
|     | 0                 | 0.2       | 0.4       |
| Tg  | 0.9999992         | 0.8034703 | 0.4798879 |
|     | 0.9999992         | 0.8245    | 0.5263    |
|     | 0.9999992         | 0.7243    | 0.6042    |
| NIS | 0.9999897         | 0.7428215 | 0.519510  |
|     | 0.9999897         | 0.7296    | 0.6023    |
|     | 0.9999897         | 0.6588    | 0.5838    |
| TPO | 0.999998          | 0.7675418 | 0.5722955 |
|     | 0.999998          | 0.7884    | 0.6041    |
|     | 0.999998          | 0.8365    | 0.5431    |

Figure 2 E

|     | PA Treatment (mM) |          |
|-----|-------------------|----------|
|     | 0                 | 0.4      |
| Tg  | 0.050000          | 0.027000 |
|     | 0.055000          | 0.0300   |
|     | 0.045000          | 0.0200   |
| NIS | 0.039000          | 0.020000 |
|     | 0.035000          | 0.0220   |
|     | 0.045000          | 0.0140   |
| TPO | 0.047000          | 0.025000 |
|     | 0.044000          | 0.0220   |
|     | 0.050000          | 0.0300   |

Figure 3 A

|    | PA Treatment (mM) |       |       |
|----|-------------------|-------|-------|
|    | 0                 | 0.2   | 0.4   |
| Tg | 30.67             | 21.74 | 1.78  |
|    | 33.45             | 41.77 | 12.94 |
|    | 37.48             | 42.60 | 18.47 |
|    | 37.97             | 43.66 | 30.71 |
|    | 45.53             | 46.57 | 34.09 |
|    | 47.46             | 50.76 | 40.79 |
|    | 48.96             | 53.29 | 44.38 |
|    | 50.56             | 62.17 | 53.49 |
|    | 65.72             | 63.74 | 56.33 |
|    | 88.82             | 67.54 |       |
|    | 103.43            | 70.56 |       |
|    | 105.00            |       |       |

Figure 3 B

|                         | PA Treatment (mM) |      |      |
|-------------------------|-------------------|------|------|
|                         | 0                 | 0.2  | 0.4  |
| I <sup>131</sup> Uptake | 0.60              | 0.36 | 0.33 |
|                         | 0.48              | 0.32 | 0.29 |
|                         | 0.45              | 0.34 | 0.33 |
|                         | 0.66              | 0.57 | 0.36 |
|                         | 0.53              | 0.62 | 0.27 |
|                         | 0.57              | 0.52 |      |

Figure 3 C

|              |   | PA Treatment (mM) |           |           |
|--------------|---|-------------------|-----------|-----------|
|              |   | 0                 | 0.2       | 0.4       |
| Fluorescence | 1 | 0.2446053         | 0.4621396 | 0.3252412 |
|              |   | 0.4124483         | 0.3838636 | 0.2393845 |
|              |   | 0.5538421         | 0.2746364 | 0.1987071 |
|              |   | 0.4488179         | 0.2504202 |           |
|              |   | 0.4530096         |           |           |
|              |   | 0.9530232         |           |           |
|              | 2 | 0.8775105         | 0.5762688 | 0.3975705 |
|              |   | 0.9107258         | 0.5178859 | 0.322144  |
|              |   | 0.9148666         | 0.3945227 | 0.2932696 |
|              |   | 0.8612037         | 0.3770108 |           |
|              |   | 0.7184623         |           |           |
|              |   | 1.084631          |           |           |

|   |          |           |           |           |
|---|----------|-----------|-----------|-----------|
|   | 3        | 0.9982252 | 0.5932095 | 0.495427  |
|   |          | 1.179743  | 0.6577726 | 0.3569379 |
|   |          | 1.267890  | 0.4959545 | 0.294899  |
|   |          | 1.233315  | 0.4839136 |           |
|   |          | 0.9280476 |           |           |
|   |          | 1.358708  |           |           |
|   | 4        | 1.358501  | 0.5978318 | 0.5405145 |
|   |          | 1.443937  | 0.6934712 | 0.3951226 |
|   |          | 1.816478  | 0.5406591 | 0.341587  |
|   |          | 1.701155  | 0.5354742 |           |
|   |          | 1.303313  |           |           |
|   |          | 1.592143  |           |           |
|   | 5        | 1.575012  | 0.5707648 | 0.5853162 |
|   |          | 1.699150  | 0.8185017 | 0.4431664 |
|   |          | 1.752443  | 0.6542727 | 0.3424017 |
|   |          | 1.901531  | 0.5781913 |           |
|   |          | 1.523622  |           |           |
|   |          | 1.734794  |           |           |
|   | 6        | 1.684353  | 0.5927567 | 0.7037156 |
|   |          | 1.670946  | 0.8891414 | 0.4664841 |
|   |          | 2.061579  | 0.7282727 | 0.3768686 |
|   |          | 2.170768  | 0.6342937 |           |
|   |          | 1.769348  |           |           |
|   |          | 1.913468  |           |           |
| 7 | 1.812307 | 0.5793424 | 0.699732  |           |
|   | 1.795269 | 1.038997  | 0.4498957 |           |
|   | 2.365619 | 0.7625682 | 0.4152852 |           |
|   | 2.421091 | 0.642437  |           |           |
|   | 2.147572 |           |           |           |
|   | 2.295348 |           |           |           |
| 8 | 1.823050 | 0.5874911 | 0.8572169 |           |
|   | 1.915939 | 1.132312  | 0.5362285 |           |
|   | 2.456747 | 0.8112273 | 0.4876018 |           |
|   | 2.700349 | 0.7115646 |           |           |
|   | 2.351290 |           |           |           |
|   | 2.276068 |           |           |           |



Supplementary Figure 2

|                |     | PA Treatment (mM) |          |
|----------------|-----|-------------------|----------|
|                |     | 0.2               | 0.4      |
| Cell Viability | 0h  | 93.7323           | 93.7323  |
|                |     | 97.15102          | 97.15102 |
|                |     | 103.6912          | 103.6912 |
|                |     | 99.23198          | 99.23198 |
|                |     | 97.596940         | 97.59694 |
|                | 24h | 99.38062          | 98.1915  |
|                |     | 96.7051           | 89.27311 |
|                |     | 101.4616          | 90.31358 |
|                |     | 93.13774          | 95.81326 |
|                |     | 95.2187           | 102.7993 |
|                | 48h | 93.58366          | 101.1643 |
|                |     | 101.1643          | 93.58366 |
|                |     | 93.58366          | 101.0157 |
|                |     | 89.57039          | 87.93535 |
|                |     | 92.09727          | 88.52991 |
|                | 72h | 89.42175          | 86.44895 |
|                |     | 90.61086          | 102.948  |
|                |     | 91.05679          | 94.02958 |
|                |     | 95.81326          | 85.40847 |
|                |     | 102.6507          | 97.4483  |

Supplementary Figure 3A

|     |   | PA Treatment (mM) |             |     |
|-----|---|-------------------|-------------|-----|
|     |   | 0                 | 0.2         | 0.4 |
| BiP | 1 | 1.310393404       | 4.055837919 |     |
|     | 1 | 2.496661098       | 7.210003701 |     |
|     | 1 | 5.938094283       | 10.33882265 |     |
